# Supplementary material for: Poly(butylene succinate-co-butylene acetylenedicarboxylate): Copolyester with Novel Nucleation Behavior
Source: MDPI journal article supplement (doi:10.3390/polym13030365), 2021-01-24
Supplement: s1 [file s1]

# Poly(butylene succinate-co-butylene acetylenedicarboxylate): Copolyester with Novel Nucleation Behavior

Yi Li, Guoyong Huang, Cong Chen, Xue-Wei Wei, Xi Dong, Wei Zhao, Hai-Mu Ye

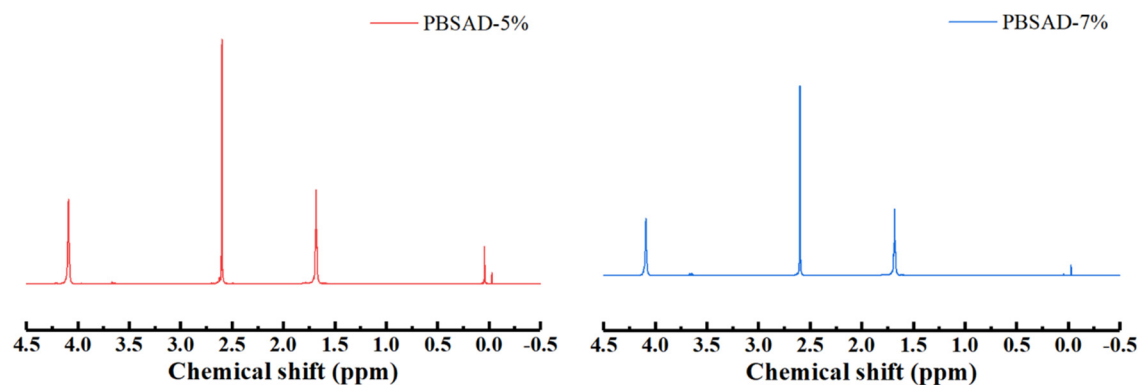

**Figure S1.** The  $^1\text{H}$  NMR spectra of PBSAD-5 and PBSAD-7. The spectrum of PBSAD-14 is presented in main text.

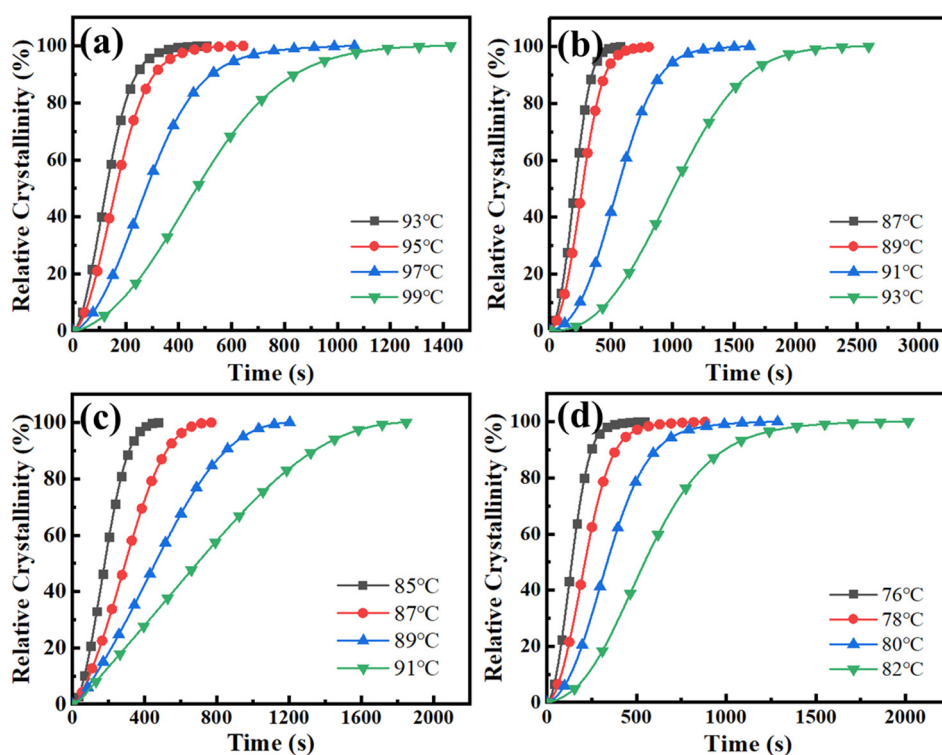

**Figure S2.** The relative crystallinity development trend of (a) PBS, (b) PBSAD-5, (c) PBSAD-7 and (d) PBSAD-14.

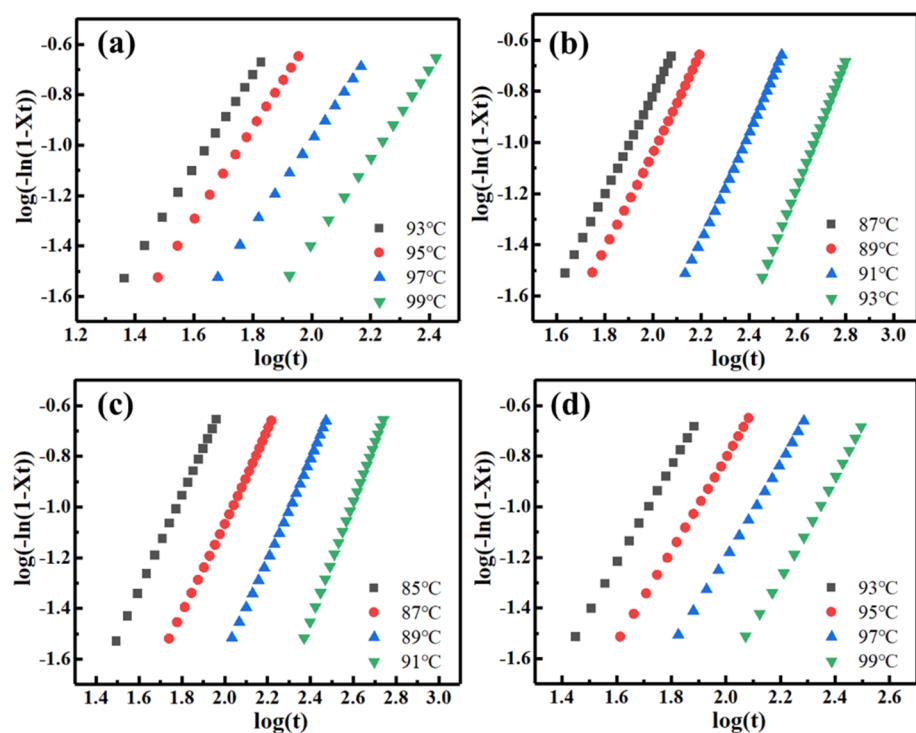

Figure S3. Avrami plots for (a) PBS, (b) PBSAD-5, (c) PBSAD-7 and (d) PBSAD-14.

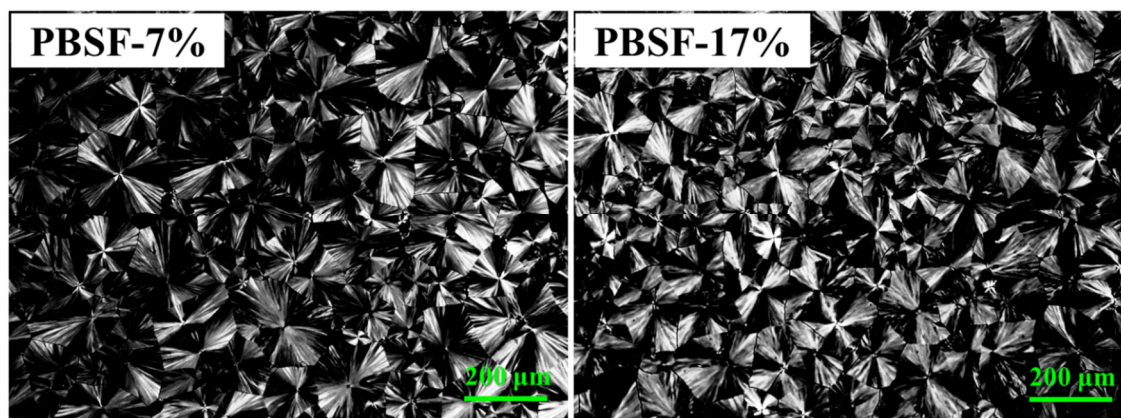

Figure S4. The spherulites morphology of PBSFs, which have similar molecular weight is PBSAD.

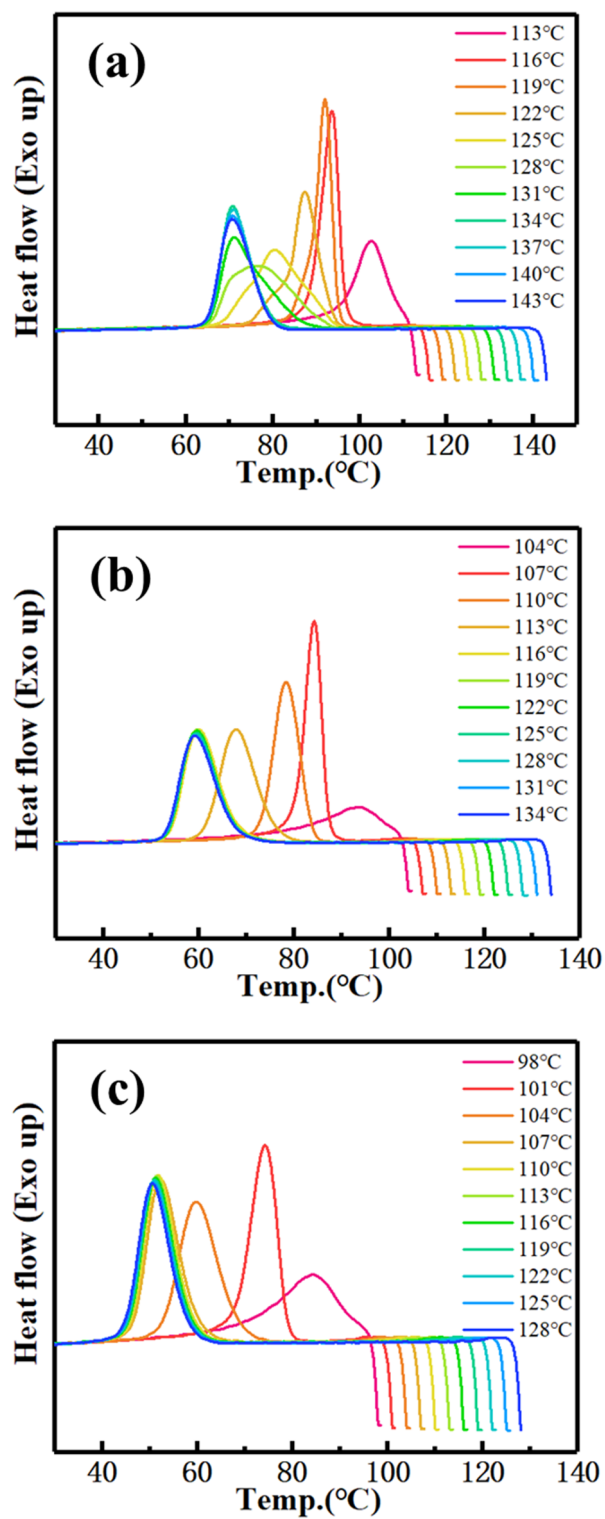

**Figure S5.** The cooling DSC curves of polyesters after being in melted at various  $T_s$  for 5 min. (a) PBS (b) PBSAD-7 and (c) PBSAD-14.
